# Supplementary material
Source: publisher figshare collection journal article supplement (https://acs.figshare.com/ndownloader/files/5719842)
Supplement: Supplementary file 1 [file 5719842]

SUPPORTING INFORMATION

for

Chemistry of the Diazeniumdiolates. 2. Kinetics and Mechanism of Dissociation to  
Nitric Oxide in Aqueous Solution

Keith M. Davies,<sup>\*,†</sup> David A. Wink,<sup>‡</sup> Joseph E. Saavedra,<sup>§</sup> and Larry K. Keefer<sup>‡</sup>

*Contribution from the Department of Chemistry, George Mason University, Fairfax, Virginia  
22030, Chemistry Section, Laboratory of Comparative Carcinogenesis, National Cancer  
Institute at Frederick, Frederick, Maryland 21702, and the Intramural Research Support  
Program, SAIC Frederick, National Cancer Institute at Frederick, Frederick, Maryland 21702*

Contents

**Figure A.** Plots of  $k_{\text{obs}}$  versus  $[\text{H}^+]$  for **2** (●) and **3** (■) in 0.10 M phosphate buffer at 37 °C.

**Figure B.**  $[\text{H}^+]$  dependence of first-order rate constant for dissociation of **4** in 0.10 M phosphate buffer at 37 °C.

**Figure C.** Plot of  $1/k_{\text{obs}}$  versus  $[\text{Fe}^{3+}]$  for 0.10 mM **5** in 0.10 M phosphate buffer at pH 7.4 and 37 °C.

**Figure D.** pH dependence of first-order rate constants for the dissociation of **6** at low pH in acetate and glycine buffers at 37 °C.

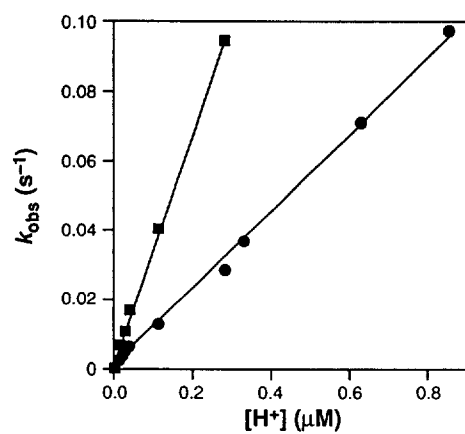

Figure A

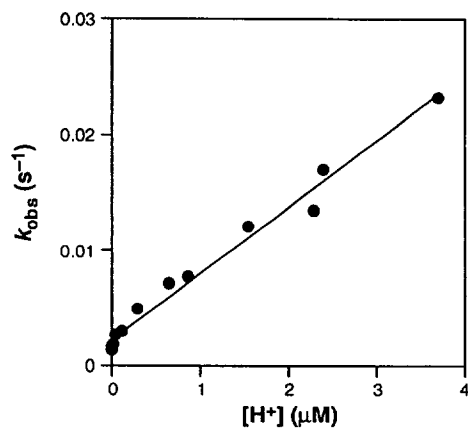

Figure B

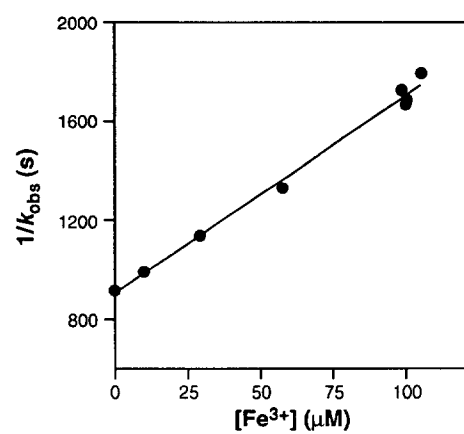

Figure C

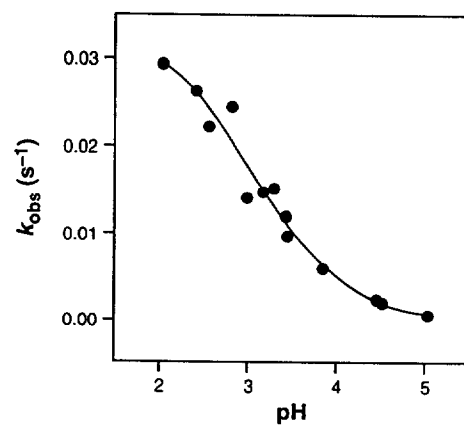

Figure D
